# Supplementary material
Source: HighWire-hosted journal article supplement (https://bmjopenquality.bmj.com/highwire/filestream/135996/field_highwire_adjunct_files/0/ds5922.docx)
Supplement: ds5922.docx [file ds5922.docx]

Results of clicks and time to successful referral
